# Supplementary material
Source: PubMed Central journal article supplement (PMC6030433)
Supplement: NIHMS967902-supplement-1.pdf [file NIHMS967902-supplement-1.pdf]

## Supplementary appendix: *STK11* Mutations and PD-1 Inhibitor Resistance in *KRAS*-Mutant Lung Adenocarcinoma

### Table of contents

|                 |       |
|-----------------|-------|
| Figure S1.....  | 2     |
| Figure S2.....  | 3     |
| Figure S3.....  | 4     |
| Figure S4.....  | 5     |
| Figure S5.....  | 6     |
| Figure S6.....  | 7     |
| Figure S7.....  | 8     |
| Figure S8.....  | 9     |
| Figure S9.....  | 10    |
| Figure S10..... | 11-12 |
| Figure S11..... | 13    |
| Figure S12..... | 14    |
| Figure S13..... | 15    |
| Figure S14..... | 16    |
| Figure S15..... | 17    |

**Figure S1**

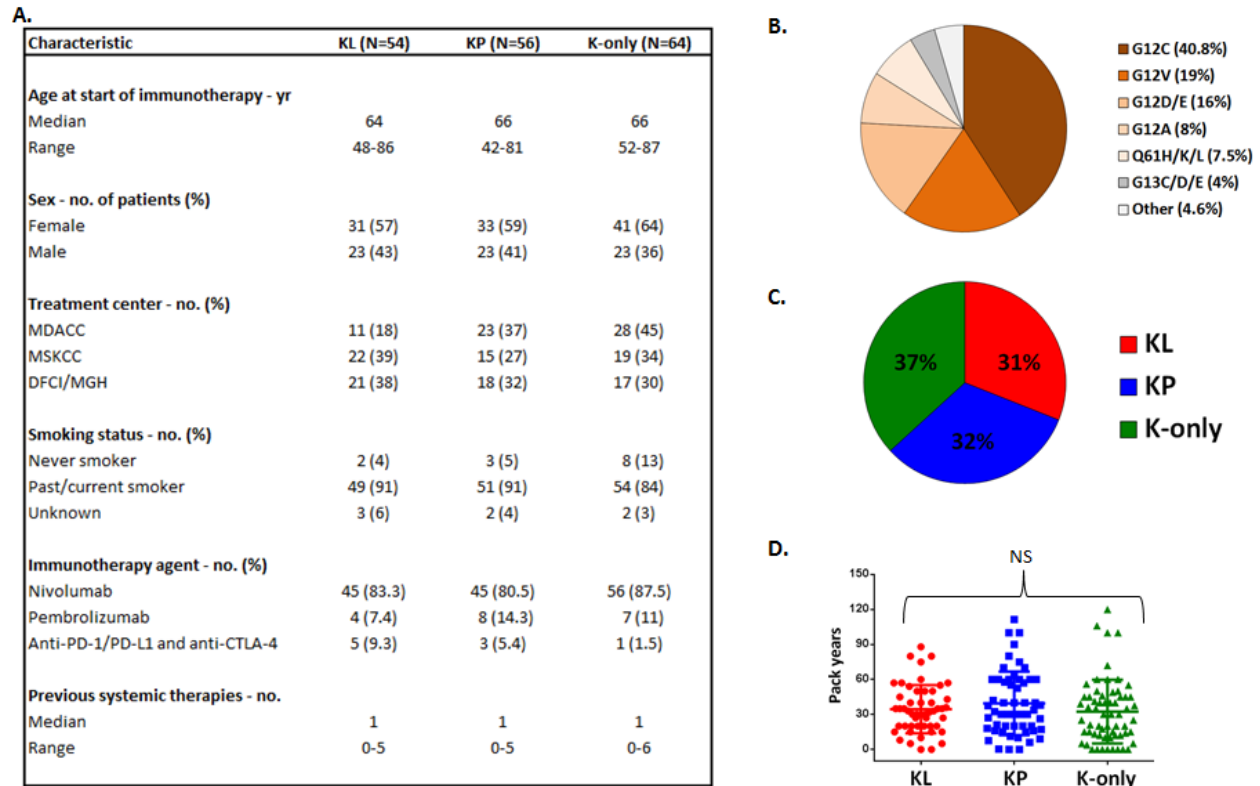

**Figure S1. Demographic, clinical and molecular features of immunotherapy-treated patients with *KRAS*-mutant LUAC in the SU2C cohort (N=174).** A. Baseline demographic and clinical characteristics of patients in the KL, KP and K-only subgroups. B. Pie chart representation of different *KRAS*-mutant alleles. C. Pie chart representation of co-mutation-defined subgroups of *KRAS*-mutant LUAC. Triple-mutant tumors (*KRAS*;*STK11/LKB1*;*TP53*) (13/174, 7.5%) were classified as KL based on previous work demonstrating shared transcriptional and immune profiles. D. Comparable smoking exposure, measured in pack-years, in the KL, KP and K-only subgroups (P=0.26, Kruskal-Wallis test).

Figure S2

| ID      | STK11 mutation        | Functional Impact (FI) | FI score (Mutation Assessor) | Polyphen-2               | Polyphen-2 score | BOR |
|---------|-----------------------|------------------------|------------------------------|--------------------------|------------------|-----|
| MDACC1  | p.D277fs*8            | High                   |                              |                          |                  | PD  |
| MDACC2  | p.L183P               | High                   | 3.86                         | Probably damaging        | 1                | PR  |
| MDACC3  | p.G37*                | High                   |                              |                          |                  | PD  |
| MDACC4  | p.G242V               | High                   | 4.69                         | Probably damaging        | 1                | PD  |
| MDACC5  | p.Y60*                | High                   |                              |                          |                  | PD  |
| MDACC6  | c.465-2A>T            | High                   |                              |                          |                  | PD  |
| MDACC7  | p.H168P               | High                   | 4.17                         | Probably damaging        | 1                | PD  |
| MDACC8  | p.N266fs              | High                   |                              |                          |                  | PD  |
| MDACC9  | p.G163R               | High                   | 3.85                         | Probably damaging        | 1                | PD  |
| MDACC10 | p.K287*               | High                   |                              |                          |                  | PD  |
| MDACC11 | exon 1 deletion       | High                   |                              |                          |                  | SD  |
| MSKCC1  | p.K36X                | High                   |                              |                          |                  | PD  |
| MSKCC2  | p.E165*               | High                   |                              |                          |                  | SD  |
| MSKCC3  | exon 5 splice variant | High                   |                              |                          |                  | PR  |
| MSKCC4  | p.N181S               | High                   | 3.53                         | Probably damaging        | 1                | PD  |
| MSKCC5  | p.R304W               | Low                    | 1.54                         | Probably damaging        | 1                | PD  |
| MSKCC6  | p.E57fs               | High                   |                              |                          |                  | PD  |
| MSKCC7  | exon 2 splice variant | High                   |                              |                          |                  | PD  |
| MSKCC8  | exon 1 splice variant | High                   |                              |                          |                  | PD  |
| MSKCC9  | p.C132fs              | High                   |                              |                          |                  | PD  |
| MSKCC10 | p.A43fs               | High                   |                              |                          |                  | PD  |
| MSKCC11 | p.E120*               | High                   |                              |                          |                  | PD  |
| MSKCC12 | p.D53fs               | High                   |                              |                          |                  | PR  |
| MSKCC13 | p.P179R               | High                   | 4.19                         | Probably damaging        | 1                | PD  |
| MSKCC14 | p.A76fs               | High                   |                              |                          |                  | PD  |
| MSKCC15 | exon 3 splice variant | High                   |                              |                          |                  | SD  |
| MSKCC16 | p.E33*                | High                   |                              |                          |                  | PD  |
| MSKCC17 | exon 2 splice variant | High                   |                              |                          |                  | PD  |
| MSKCC18 | p.H174R               | High                   | 4.21                         | Probably damaging        | 1                | PD  |
| MSKCC19 | p.Y60fs               | High                   |                              |                          |                  | PD  |
| MSKCC20 | p.K78*                | High                   |                              |                          |                  | PD  |
| MSKCC21 | p.Q159*               | High                   |                              |                          |                  | PD  |
| MSKCC22 | p.G37*                | High                   |                              |                          |                  | PD  |
| DFCI1   | p.K84*                | High                   |                              |                          |                  | PD  |
| DFCI2   | p.A205fs              | High                   |                              |                          |                  | PD  |
| DFCI3   | p.G279fs              | High                   |                              |                          |                  | PR  |
| DFCI4   | p.R40fs               | High                   |                              |                          |                  | PD  |
| DFCI5   | p.A76P/Copy loss      | Medium                 | 3.365                        | Probably damaging        | 1                | PD  |
| DFCI6   | c.464+1G>A            | High                   |                              |                          |                  | PD  |
| DFCI7   | p.G251V               | Medium                 | 3.15                         | Probably damaging        | 1                | PD  |
| DFCI8   | p.E193D               | Low                    | 0.98                         | Probably damaging        | 0.962            | PD  |
| DFCI9   | p.L245P               | High                   | 4.075                        | Probably damaging        | 1                | SD  |
| DFCI10  | Copy loss             | NA                     |                              |                          |                  | PD  |
| DFCI11  | Copy loss             | NA                     |                              |                          |                  | PD  |
| DFCI12  | Copy loss             | NA                     |                              |                          |                  | PD  |
| DFCI13  | Copy loss             | NA                     |                              |                          |                  | PD  |
| MGH1    | p.G242V               | High                   | 4.69                         | Probably damaging        | 1                | SD  |
| MGH2    | p.W308L               | Medium                 | 2.235                        | Probably damaging        | 1                | PD  |
| MGH3    | p.G58Vfs*103          | High                   |                              |                          |                  | SD  |
| MGH4    | p.W308L, p.R384Q      | Medium/Low             | 2.235/1.355                  | Probably damaging/benign | 1/0.002          | SD  |
| MGH5    | p.H174R               | High                   | 4.21                         | Probably damaging        | 1                | PD  |
| MGH6    | Splice acceptor site  | High                   |                              |                          |                  | SD  |
| MGH7    | p.P323Yfs*13; SA site | High                   |                              |                          |                  | PD  |
| MGH8    | p.D53Tfs*11           | High                   |                              |                          |                  | PD  |
| CM057.1 | p.Q214*               | High                   |                              |                          |                  | PD  |
| CM057.2 | p.D53Tfs*11           | High                   |                              |                          |                  | PD  |
| CM057.3 | p.W308C               | Medium                 | 2.785                        | Probably damaging        | 1                | SD  |
| CM057.4 | p.P281Rfs*6           | High                   |                              |                          |                  | PD  |
| CM057.5 | splice site variant   | High                   |                              |                          |                  | PD  |
| CM057.6 | splice site variant   | High                   |                              |                          |                  | PD  |

Figure S2. Functional assessment of individual *STK11/LKB1* genomic alterations in the SU2C and CM-057 cohorts. Frameshift, nonsense and splice-site mutations were considered pathogenic. The functional significance of missense mutations was evaluated using a) Mutation Assessor (mutationassessor.org) and b) Polyphen-2. The overwhelming majority of identified *STK11/LKB1* alterations were predicted to be deleterious.

Figure S3

|         | STK11/LKB1 mutation | STK11/LKB1 IHC score | TMB (per Mb) | PD-L1 expression | KRAS mutation | Other co-mutations                                                                                                                                                                                                                                                                                                                                                                                                                                                                                                                                   |
|---------|---------------------|----------------------|--------------|------------------|---------------|------------------------------------------------------------------------------------------------------------------------------------------------------------------------------------------------------------------------------------------------------------------------------------------------------------------------------------------------------------------------------------------------------------------------------------------------------------------------------------------------------------------------------------------------------|
| MDACC2  | p.L183P             | NA                   | NA           | NA               | p.G13C        | None detected                                                                                                                                                                                                                                                                                                                                                                                                                                                                                                                                        |
| MSKCC3  | X245_splice         | NA                   | 8.49         | NA               | p.G12C        | INPP4B X45_splice<br>KEAP1 p.S431F<br>KMT2D p.G4716W<br>MAP3K1 p.G530V<br>E2F3 p.A159S<br>TGFBR1 p.E247V<br>MED12 p.M1473I                                                                                                                                                                                                                                                                                                                                                                                                                           |
| MSKCC12 | p.D53Gfs*110        | 0                    | 5.66         | 1%               | p.G12C        | FLT1 p.G82V<br>DOT1L p.S490P<br>KEAP1 p.V132G<br>AURKA p.Q55L                                                                                                                                                                                                                                                                                                                                                                                                                                                                                        |
| DFCI3   | p. P281Afs*6        | NA                   | NA           | 0%               | p.G12A        | ATM p.Y2437D<br>BMPR1A p.YQLPY453del<br>TET2 p.K655fs<br><u>High copy number gain:</u><br>MYCL, MPL<br><u>Low copy number gain:</u><br>MCL1, CRTC2, NTRK1, SDHC, DDR2, RFWD2, CDC73, PIK3C2B, MDM4, H3F3A, FH, AKT3, GLI2, ERCC3, NFE2L2, PMS1, SF3B1, IDH1, ERBB4, CADM2, MECOM, ETV5, FANCE, CDKN1A, PIM1, CCND3, PRKDC, MYBL1, NBN, RAD21, EXT1, MYC, PTK2, RECQL4, PRF1, BMPR1A, PTEN, FAS, SUFU, SMC3, TCF7L2, FGFR2, SETBP1, SMAD2, SMAD4, BCL2<br><u>Single copy deletion:</u><br>STK11, TCF3, GNA11, KEAP1, SMARCA4, BRD4, GATA4, WRN, FGFR1 |

Figure S3. Molecular characteristics of rare KL tumors in the SU2C cohort that responded to PD-1 blockade. The specific mutations in *STK11/LKB1* and *KRAS* are shown as well as the full panel of detected co-occurring genetic alterations. Where available, TMB (per Mb), STK11/LKB1 IHC score and tumor cell PD-L1 expression (as percent of positive staining membranes) are also indicated.

**Figure S4**

**A. CheckMate-057, Nivolumab Arm (N=24 *KRAS*-mutant)**

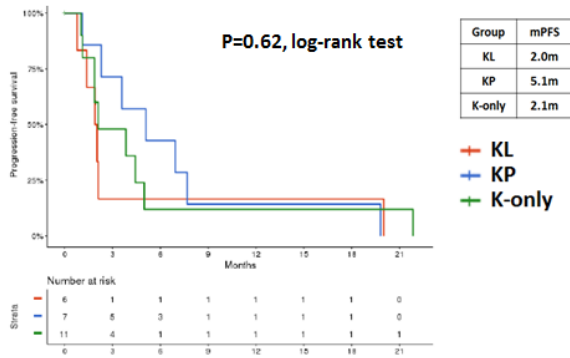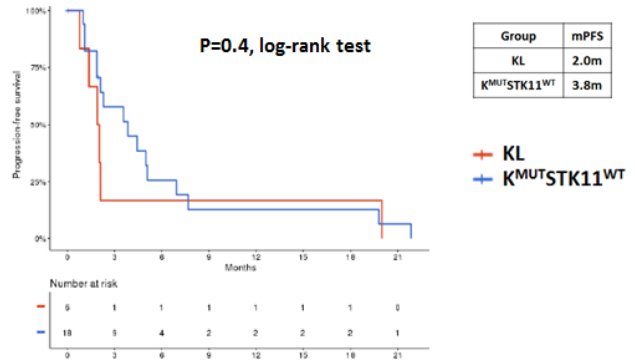

**B. CheckMate-057, Docetaxel Arm (N=20 *KRAS*-mutant)**

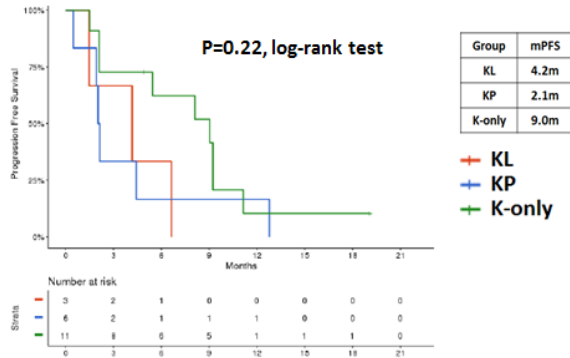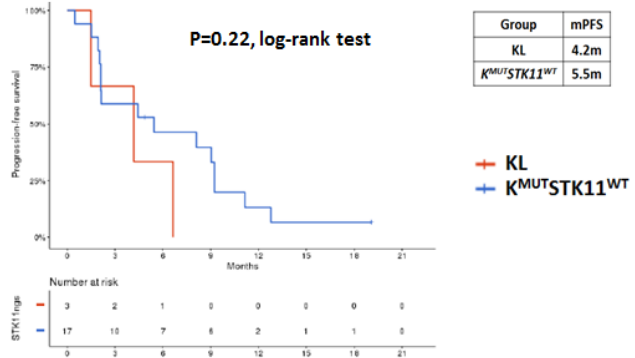

**Figure S4. Progression-free survival in co-mutation defined subgroups of *KRAS*-mutant NSCLC in the Nivolumab (A) and Docetaxel (B) arms of CheckMate-057.**

Figure S5

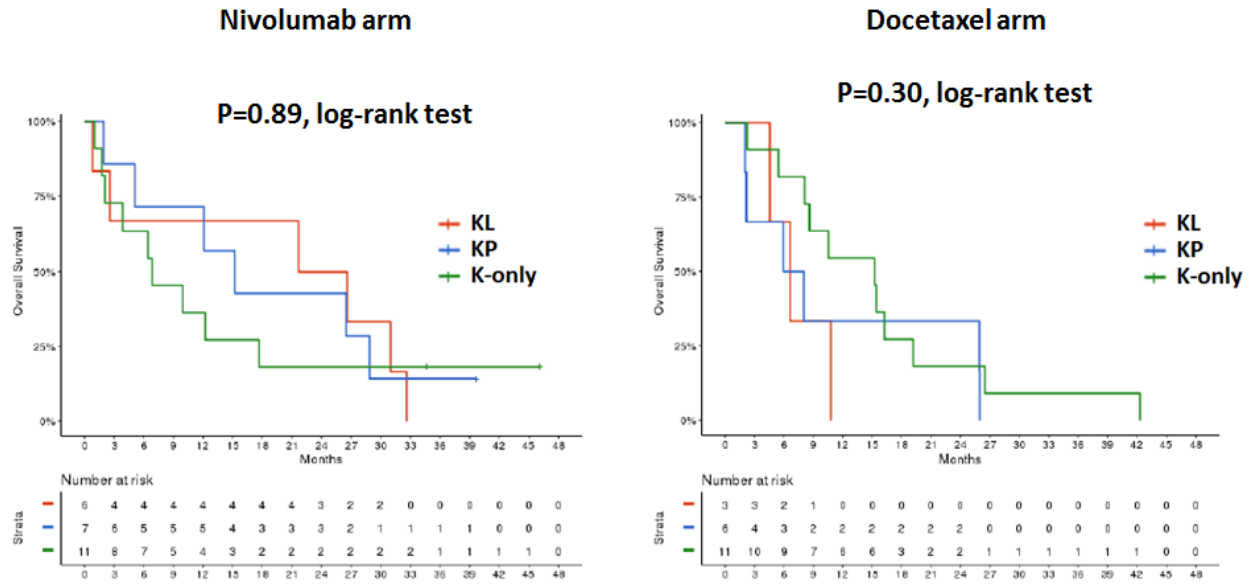

Figure S5. Overall survival with nivolumab and docetaxel in the KL, KP and K-only subgroups in

CheckMate-057

Figure S6.

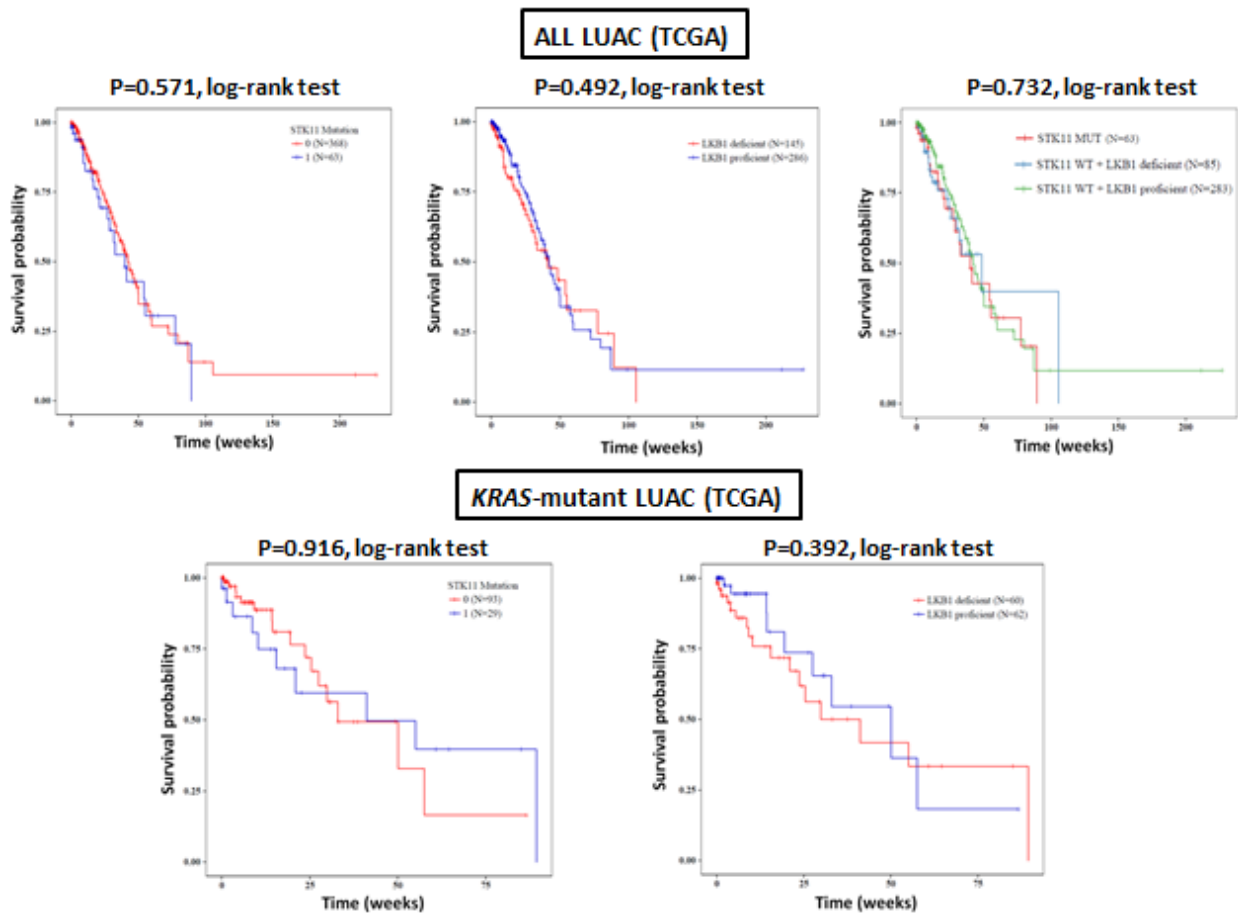

Figure S6. *STK11/LKB1* mutation or deficiency does not impact overall survival in the TCGA cohort of LUAC (N=431) and *KRAS*-mutant LUAC (N=122).

Figure S7.

A.

| Characteristic                        | KL (N = 78) | KP (N = 160) | K-only (N = 108) | L (N = 77) | P (N = 344) | pan-WT (N = 157) |
|---------------------------------------|-------------|--------------|------------------|------------|-------------|------------------|
| <b>Age at sample procurement - yr</b> |             |              |                  |            |             |                  |
| Median                                | 65          | 66           | 69               | 68         | 67          | 67               |
| Range                                 | 46-83       | 43-85        | 39-87            | 39-87      | 32-88       | 23-88            |
| <b>Sex - no. of patients (%)</b>      |             |              |                  |            |             |                  |
| Female                                | 44 (56)     | 103 (64)     | 64 (59)          | 35 (45)    | 173 (50)    | 92 (59)          |
| Male                                  | 34 (44)     | 57 (36)      | 44 (41)          | 42 (55)    | 171 (50)    | 65 (41)          |

B.

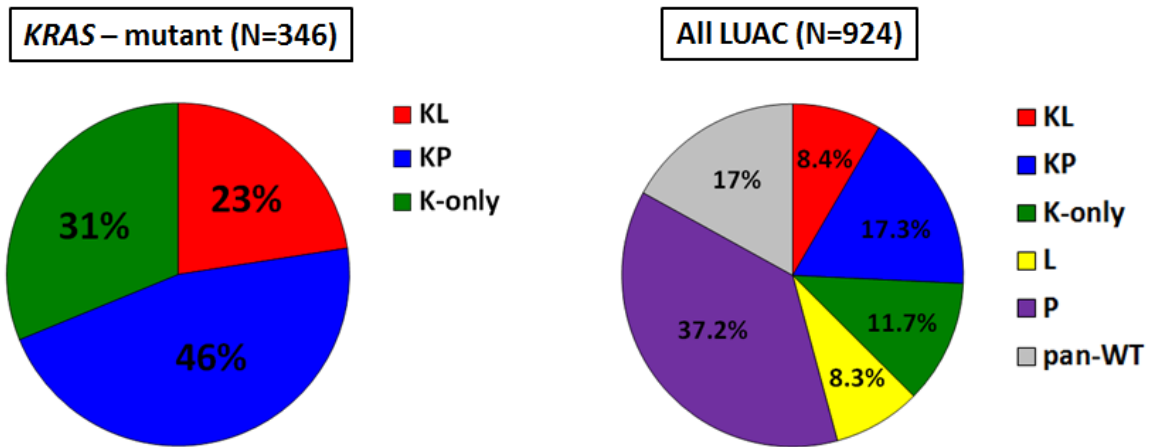

Figure S7. Demographic and molecular characteristics of 924 LUAC in the FM cohort. A. Baseline characteristics of the different genomic-alteration-defined subgroups. B. Fractional representation of the KL, KP, K-only subgroups among 346 *KRAS*-mutant LUAC. C. Pie chart representation of the relative frequencies of the KL, KP, K-only subgroups and their *KRAS*-wild-type counterparts (L – *STK11/LKB1* altered, P – *TP53* altered, pan-WT – no alteration in *KRAS*, *STK11/LKB1*, or *TP53*). *STK11/LKB1*/*TP53* double-mutant tumors with wild-type *KRAS* were classified as L.



Figure S8.

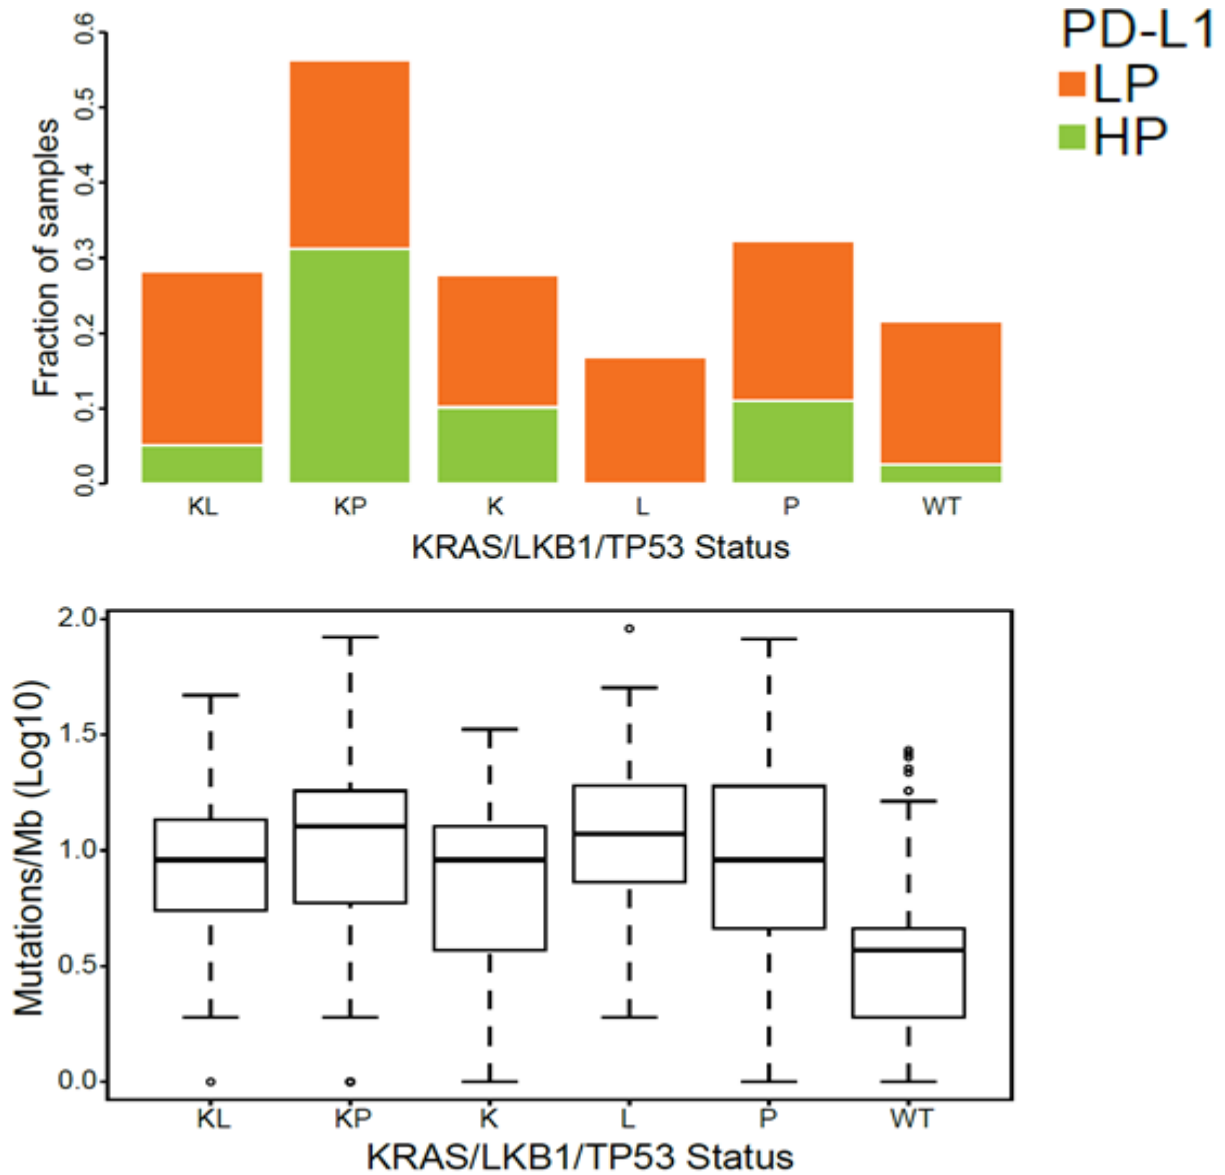

Figure S8. PD-L1 expression (top panel) and TMB (log10) (bottom panel) stratified by *STK11/TP53/KRAS* alteration in LUAC. For *KRAS*-wild-type samples: L – *STK11/LKB1* altered, P – *TP53* altered, WT – no alteration in *KRAS*, *STK11/LKB1*, or *TP53*. Note that L tumors (*STK11/LKB1*-altered with wild-type *KRAS*) also express low levels of PD-L1, despite high TMB that is comparable to that of KP tumors.

Figure S9.

**A. FM cohort (N=346)**

| Group  | PD-L1 expression (SP142) |                |                |
|--------|--------------------------|----------------|----------------|
|        | 0%                       | 1%-49%         | ≥50%           |
| KL     | 71.8% (56/78)            | 23.1% (18/78)  | 5.1% (4/78)    |
| KP     | 43.7% (70/160)           | 25% (40/160)   | 31.3% (50/160) |
| K-only | 72.2% (78/108)           | 17.6% (19/108) | 10.2% (11/108) |

**P<0.001,  
Chi square test**

**B. SU2C cohort (N=69)**

| Group  | PD-L1 expression (E1L3N) |              |              |
|--------|--------------------------|--------------|--------------|
|        | 0%                       | 1%-49%       | ≥50%         |
| KL     | 86.4% (19/22)            | 13.6% (3/22) | 0% (0/22)    |
| KP     | 45.5% (10/22)            | 31.8% (7/22) | 22.7% (5/22) |
| K-only | 68% (17/25)              | 16% (4/25)   | 16% (4/25)   |

**P=0.018,  
Fisher's exact test**

**C. CM-057 cohort (N=44)**

| Group  | PD-L1 expression (28.8) |              |              |
|--------|-------------------------|--------------|--------------|
|        | 0%                      | 1%-49%       | ≥50%         |
| KL     | 88.9% (8/9)             | 11.1% (1/9)  | 0% (0/9)     |
| KP     | 15.4% (2/13)            | 30.8% (4/13) | 53.8% (7/13) |
| K-only | 31.8% (7/22)            | 27.3% (6/22) | 40.9% (9/22) |

**P=0.0014,  
Fisher's exact test**

Figure S9. Tumor-cell membranous expression of PD-L1 in the KL, KP and K-only subgroups across the FM, SU2C and CM-057 clinical cohorts. All patients (N=44) regardless of treatment arm allocation from CM-057 were included in the analysis. A two-tailed Chi square or Fisher's exact test (computed from a 2x3 contingency table) was used to assess the significance of the association between group membership and PD-L1 expression status [PD-L1 negative (0%) or PD-L1 positive (≥1%)].

Figure S10.

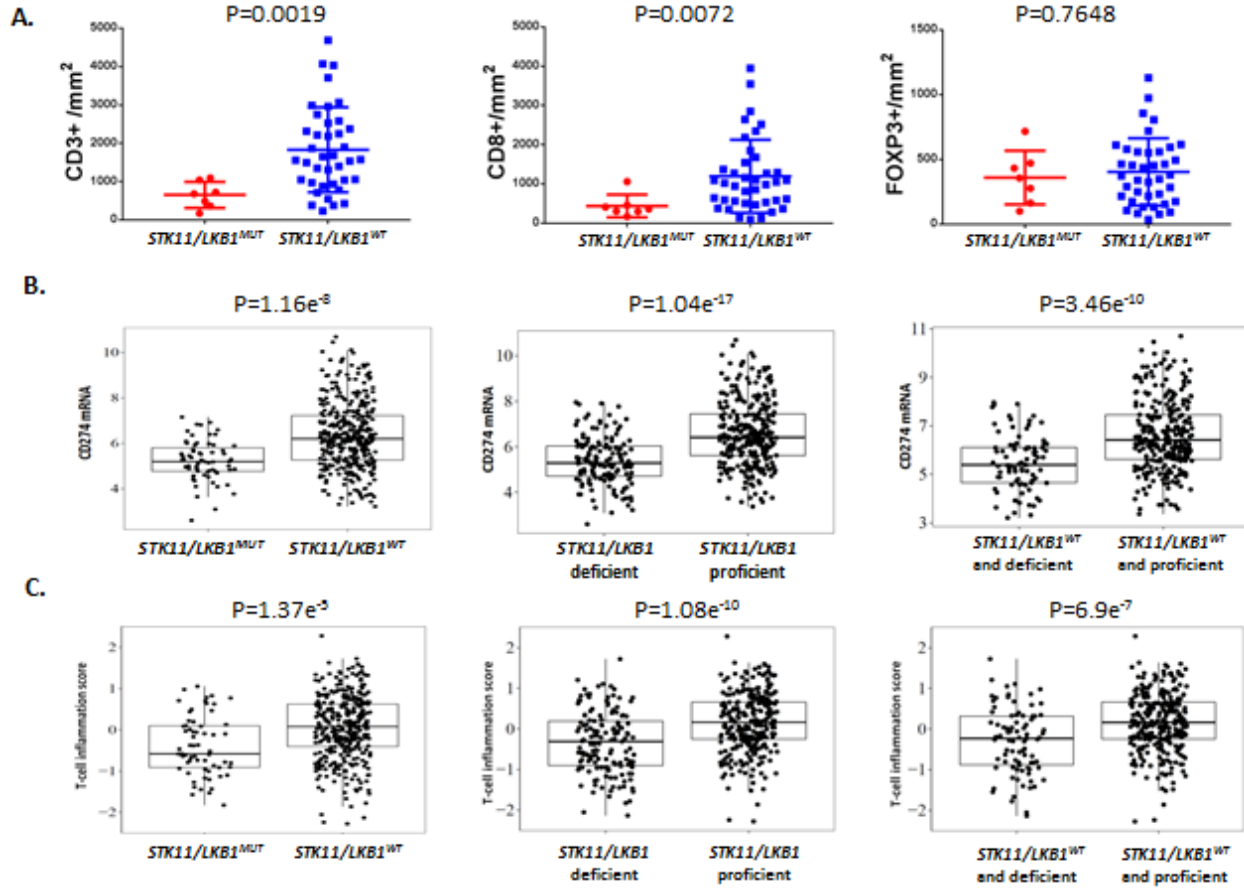

Figure S10. *STK11/LKB1* inactivation is associated with a non-T-cell-inflamed tumor immune microenvironment in lung adenocarcinoma. A. Densities of infiltrating CD3+, CD8+ and FOXP3+ T-lymphocytes in *STK11/LKB1*-mutant and wild-type LUAC (regardless of *KRAS* status) from the PROSPECT cohort of surgically resected, early-stage LUAC. The Mann-Whitney U test was used to compare densities of TILs between *STK11/LKB1*-mutant and wild-type tumors.  $P \leq 0.05$  was considered statistically significant. B. Comparison of *CD274* (*PD-L1*) mRNA levels (log<sub>2</sub> transformed RSEM values) (from RNASeq data, downloaded from the TCGA website on 08/26/2016) between *STK11/LKB1*-mutant and wild type (left panel) or *STK11/LKB1* deficient and proficient (middle panel) LUAC in the TCGA cohort. *STK11/LKB1* deficiency was determined using a previously validated gene expression signature. The right panel depicts *CD274* mRNA levels (log<sub>2</sub> transformed RSEM values) in *STK11/LKB1* deficient LUAC with wild-

type *STK11/LKB1* status compared to *STK11/LKB1* proficient wild-type tumors. Student's t-test was used for statistical comparisons. C. *STK11/LKB1*-altered or deficient LUAC exhibit lower levels of T-cell signature transcripts (from a previously established 13-gene signature) (30).

**Figure S11.**

**A. Progression-free survival**

|                         | loglik  | Chisq   | df | p-value  |
|-------------------------|---------|---------|----|----------|
| Null model              | -107.38 |         |    |          |
| PD-L1                   | -107.36 | 0.0356  | 1  | 0.850374 |
| STK11                   | -102.08 | 10.5654 | 1  | 0.001152 |
| PD-L1 STK11 interaction | -102.08 | 0.4896  | 1  | 0.484087 |

PD-L1 ≥ 50% group:

HR 0.14 (95% CI, 0.04 - 0.5), P= 0.0005, log-rank test

PD-L1 <50% group:

HR 0.27 (95% CI, 0.08 - 0.94), P=0.0278, log-rank test

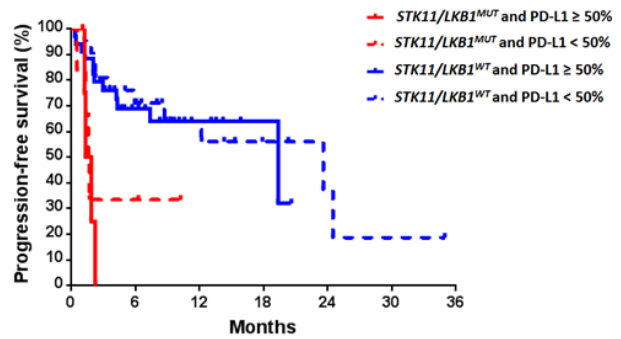

**B. Overall survival**

|                         | loglik  | Chisq   | df | p-value   |
|-------------------------|---------|---------|----|-----------|
| Null model              | -36.765 |         |    |           |
| PD-L1                   | -36.765 | 0.0515  | 1  | 0.8204261 |
| STK11                   | -30.502 | 12.5266 | 1  | 0.0004012 |
| PD-L1 STK11 interaction | -30.358 | 0.2883  | 1  | 0.5913080 |

PD-L1 ≥ 50% group:

HR 0.11 (95% CI, 0.015 - 0.78), P= 0.0075, log-rank test

PD-L1 <50% group:

HR 0.05 (95% CI, 0.004 - 0.49), P=0.0278, log-rank test

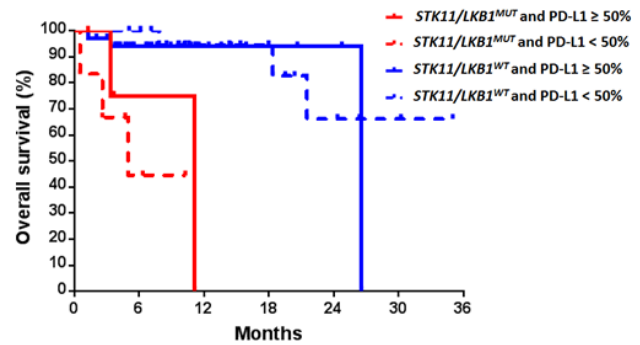

**Figure S11. *STK11/LKB1* genomic alterations impact PFS and OS with PD-1/PD-L1 blockade**

**independently of the level of PD-L1 expression in PD-L1 positive NSCLC.** A. (Left panel) Analysis of the deviance table for PFS. The interaction effect is not significant (P=0.48), indicating that the effect of *STK11/LKB1* genomic alterations on PFS does not differ significantly across the two PD-L1 expression groups (≥ 50% and <50%). (Right panel) Kaplan-Meier estimates of PFS with PD-1/PD-L1 blockade in *STK11/LKB1*-mutant and wild-type groups depending on PD-L1 expression. B. (Left panel) Analysis of the deviance table for OS. The interaction effect is not significant (P=0.59), indicating that the effect of *STK11/LKB1* genomic alterations on OS does not differ significantly across the two PD-L1 expression groups (≥ 50% and <50%). (Right panel) Kaplan-Meier estimates of OSS with PD-1/PD-L1 blockade in *STK11/LKB1*-mutant and wild-type groups depending on PD-L1 expression.

Figure S12.

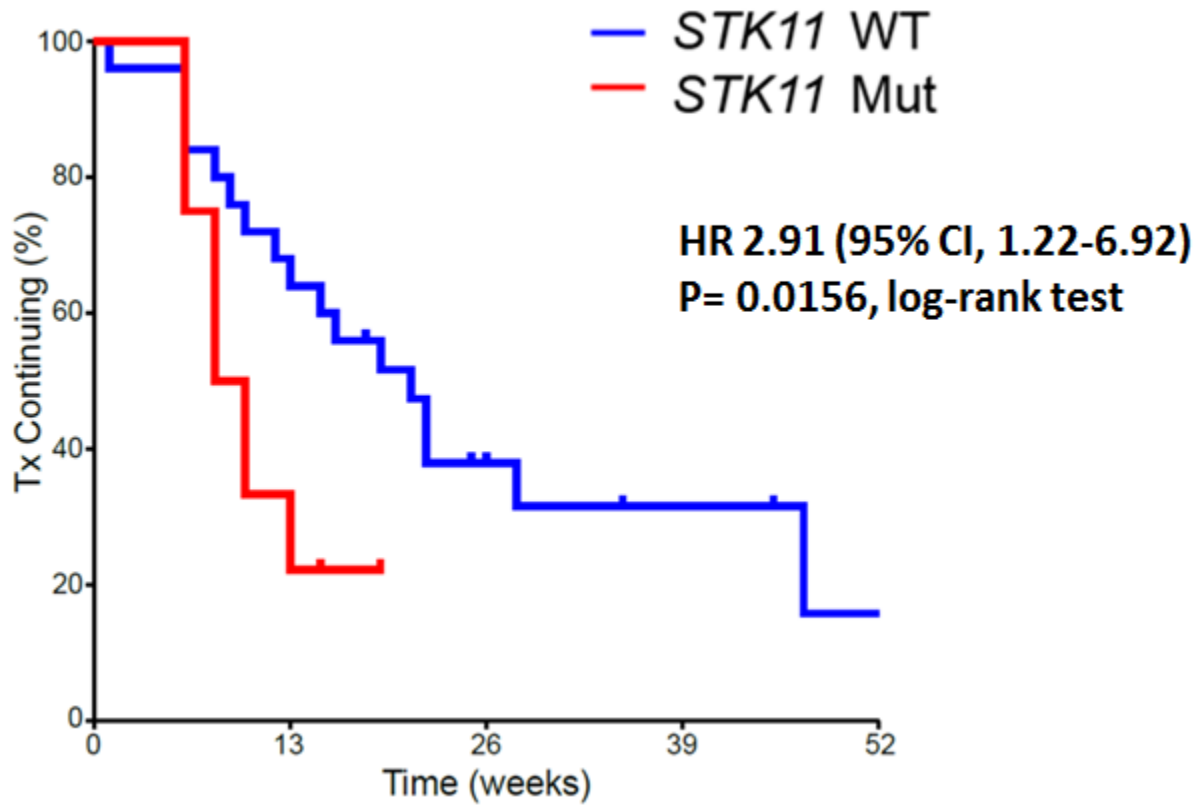

Figure S10. *STK11/LKB1* genomic alterations are associated with shorter time on PD-1/PD-L1 inhibitor in non-squamous NSCLC with intermediate/high TMB. Kaplan-Meier estimates of time to treatment discontinuation in a separate cohort of 81 patients with non-squamous NSCLC treated with anti-PD(L)-1 therapy (68 nivolumab, 6 pembrolizumab, 5 avelumab, 1 atezolizumab, 1 durvalumab).

Figure S13.

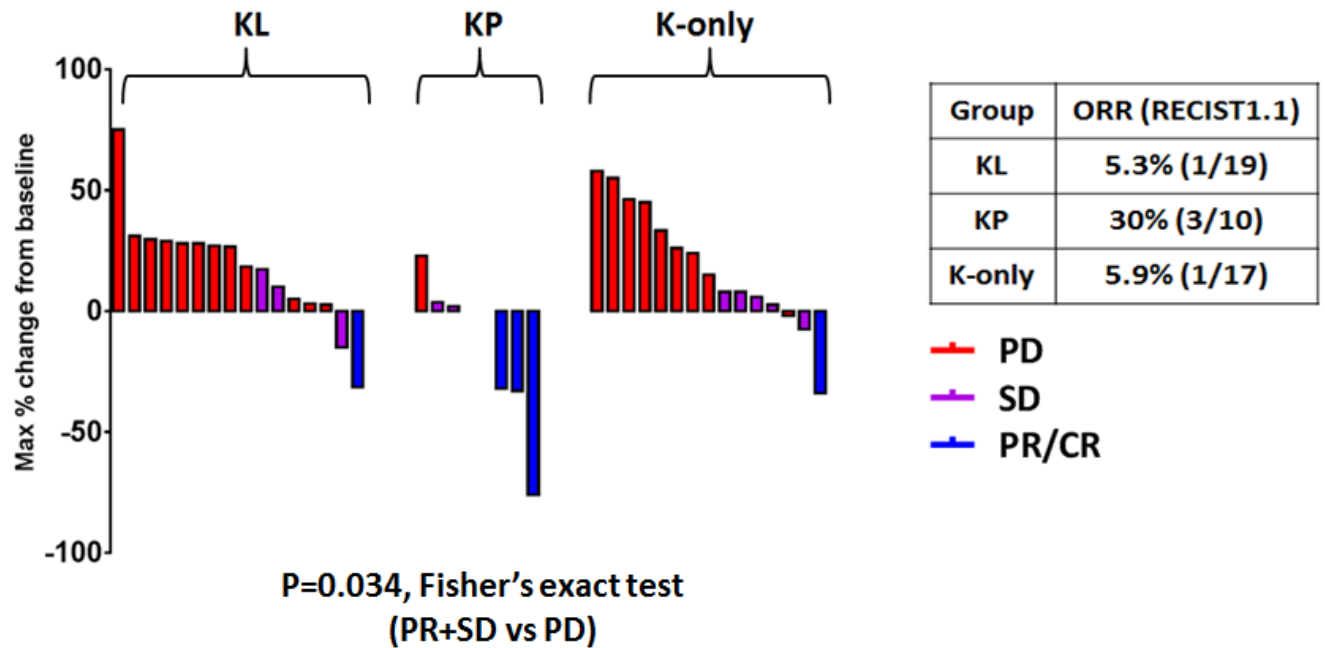

Figure S13. *TP53* genomic alterations may aid prediction of PD-1 inhibitor response in PD-L1-negative *KRAS*-mutant LUAC. Disease control rate with PD-1 blockade among PD-L1-negative *KRAS*-mutant LUAC differs significantly between KP, KL and K-only subgroups (Left panel). Waterfall plot demonstrating patient-level maximal % change in tumor burden from baseline in response to PD-1/PD-L1 inhibitor therapy in PD-L1-negative *KRAS*-mutant LUAC. Fisher's exact test (2x3 contingency table) was used to assess the significance of the association between co-mutation group membership and disease control rate (CR/PR/SD vs PD). Among PD-L1-negative LUAC, KP exhibited the highest DCR (70%) with PD-1 blockade with PR observed in 3/10 (Right panel).

Figure S14.

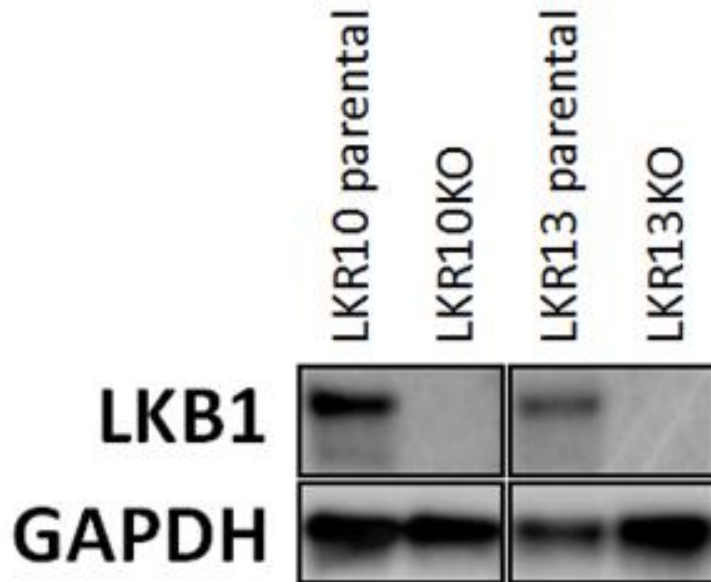

Figure S14. LKB1 expression in isogenic derivatives of the LKR10 and LKR13 *Kras*-mutant murine LUAC cell line with CRISPR/Cas9-mediated *Stk11/Lkb1* knockout. Immunoblotting using a commercially available validated rabbit monoclonal antibody (clone D60C5, Cell Signaling Technology) confirms efficient depletion of LKB1 in single-cell derived LKR10KO and LKR13KO lines.



Figure S15.

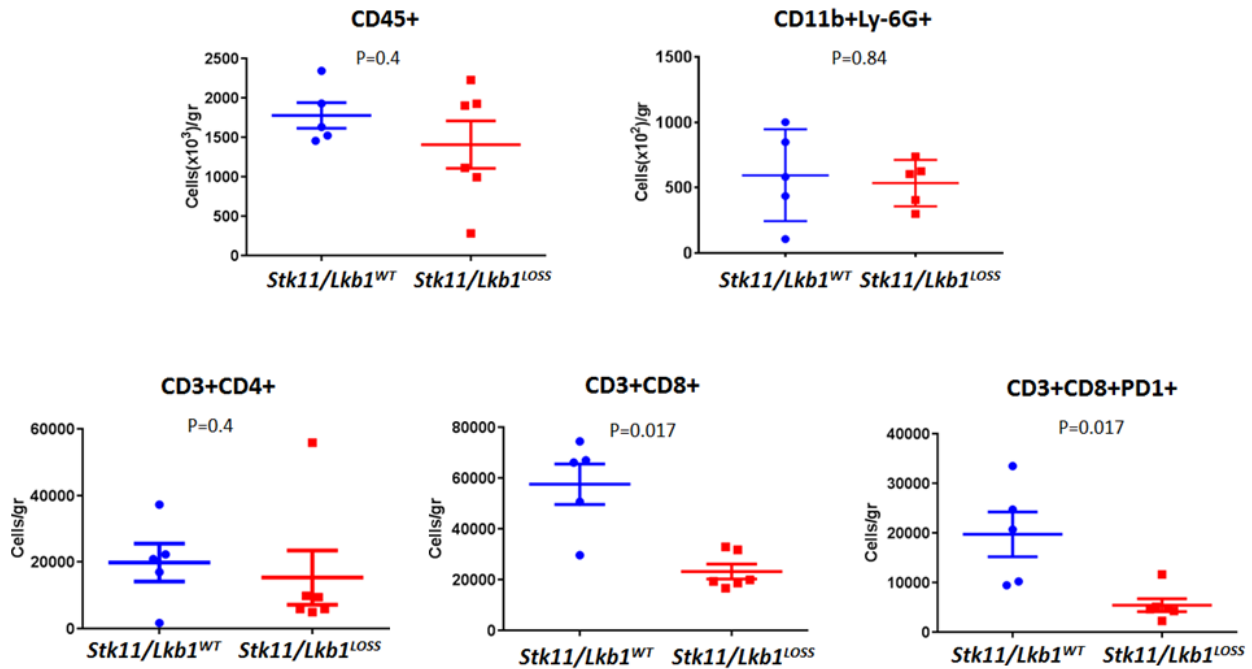

Figure S15. *Stk11/Lkb1* genetic ablation directly promotes establishment of a “cold” tumor immune microenvironment in a syngeneic murine model of *Kras*-mutant LUAC (LKR13). Numbers of CD45+ (top left panel), CD11b+Ly-6G+ (top right panel), CD3+CD4+ (bottom left panel), CD3+CD8+ (bottom middle panel) and CD3+CD8+PD1+ (bottom right panel) per gr of explanted subcutaneous tumors, following dissociation to a single cell suspension and FACS sorting. The Mann Whitney U test was used to compare numbers of the indicated cellular populations per gr of excised whole tumor.  $P \leq 0.05$  was considered statistically significant.
